# Supplementary material for: ARMH4 accelerates aging by maintaining a positive-feedback growth signaling circuit
Source: Research Square preprint supplement (doi:10.21203/rs.3.rs-5541791/v1), 2024-12-18
Supplement: Supplementary file 1 [file 161c9f294de585b3a3d12bf1.docx]

**Supplementary Materials**

This file contains Extended Data Figures 1-3 and Supplementary Tables S1-S2.

**Extended Data Figures**

**Extended Data Fig. 1**


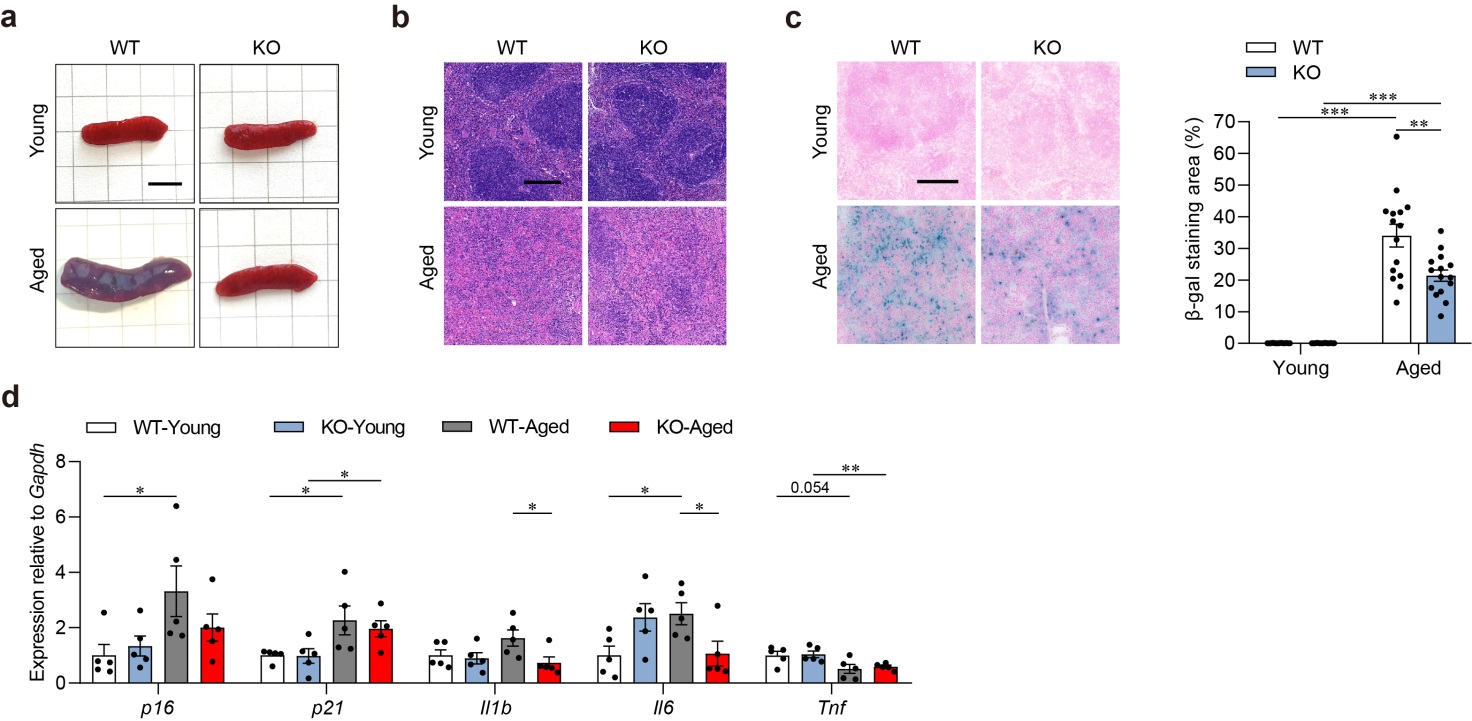


**Extended Data Fig. 1| *Armh4* deficiency decelerates splenic aging.**

**a**, Representative images of spleens from wild-type (WT) and *Armh4*-knockout (KO) mice at 8-week (young) or 25-month (aged) old.

**b**, Representative hematoxylin and eosin (H&E) staining images of spleens from above-mentioned groups. Scaler bar, 200μm. n = 3.

**c**, Representative images (left) and quantitative data (right) showing the β-galactosidase (β-Gal) activity in spleens from above-mentioned groups. Scaler bar, 200μm. n = 15.

**d**, Quantitative reverse transcription polymerase chain reaction (qRT-PCR) assays showing the senescence-associated secretory phenotype (SASP) factors, including *p16*, *p21*, *Il1b*, *Il6*, and *Tnf*. n = 5.

*P < 0.05, **P < 0.01, ***P < 0.001.

**Extended Data Fig. 2**

**
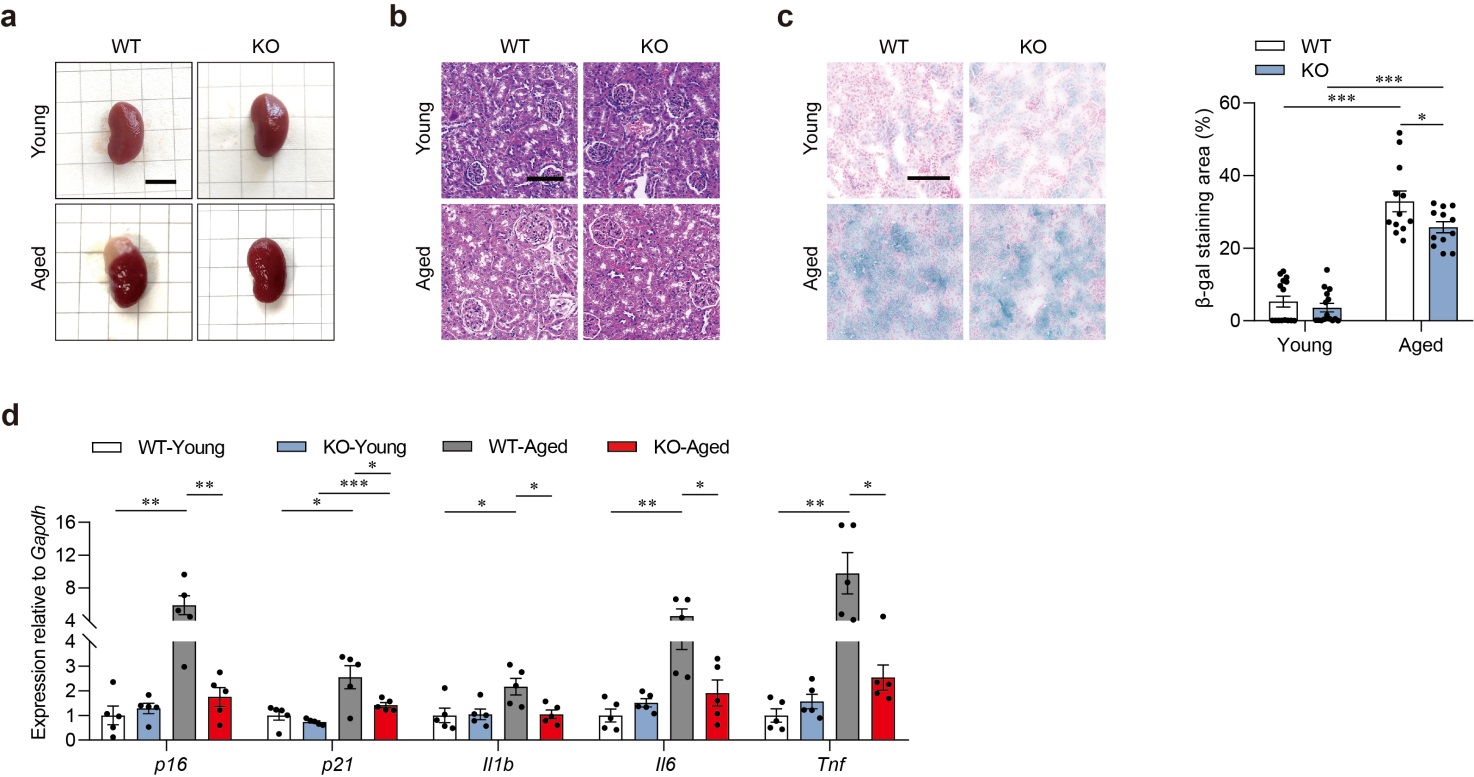
**

**Extended Data Fig. 2| *Armh4* deficiency decelerates renal aging.**

**a**, Representative images of kidneys from WT and *Armh4*-KO mice at 8-week (young) or 25-month (aged) old.

**b**, Representative H&E staining images of kidneys from above-mentioned groups. Scaler bar, 100μm. n = 3.

**c**, Representative images and quantitative results showing the β-Gal activity in kidneys from above-mentioned groups. Scaler bar, 200μm. n = 15.

**d**, qRT-PCR assays showing the SASP factors, including *p16*, *p21*, *Il1b*, *Il6*, and *Tnf*. n = 5.

*P < 0.05, **P < 0.01, ***P < 0.001.

**Extended Data Fig. 3**


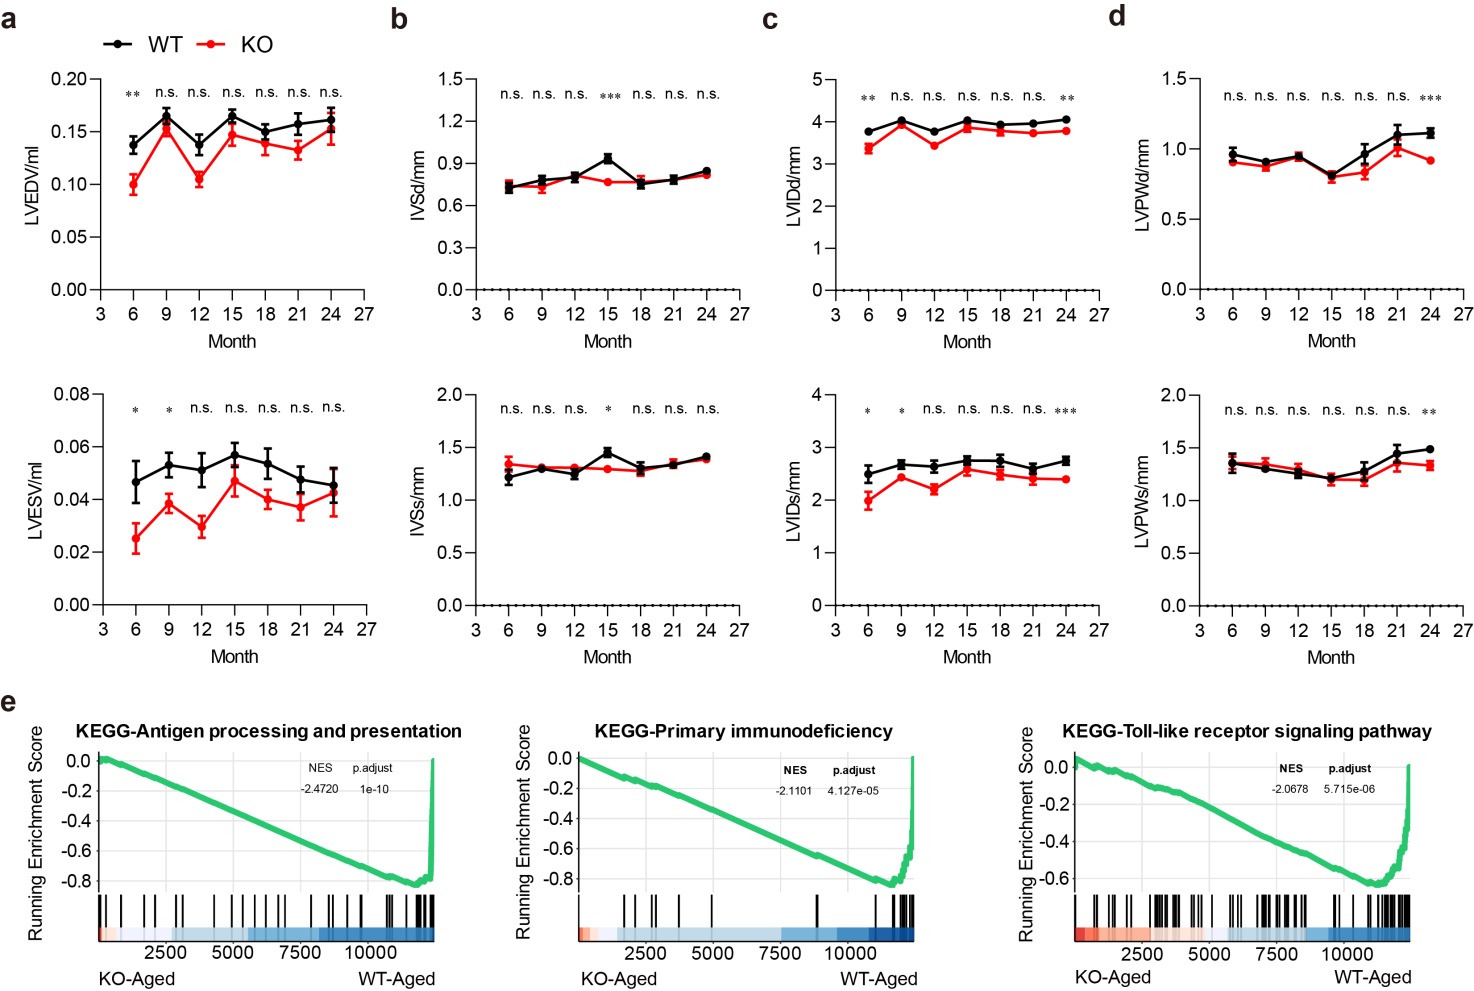


**Extended Data Fig. 3| *Armh4* deficiency decelerates cardiac aging.**

**a-d**, Echocardiographic results showing the impacts of *Armh4* deficiency on left ventricular volume at end-diastolic (LVEDV; **a**, upper) or end-systolic (LVESV; **a**, lower) phases, inter-ventricle septum width at diastolic (IVSd; **b**, upper) or systolic (IVSs; **b**, lower) phases, left ventricular inner diameter at diastolic (LVIDd; **c**, upper) or systolic (LVIDs; **c**, lower) phases, and left ventricular postal wall thickness at diastolic (LVPWd; d, upper) or systolic (LVPW; **d**, lower) phases during aging. n = 9~12.

**e**, Gene set enrichment analysis (GSEA) of the RNA-seq data showing the inflammation-related KEGG pathways altered by *Armh4* deficiency in the heart.

*P < 0.05, **P < 0.01, ***P < 0.001.

**Supplementary Tables**

**Table S1. Sequences of siRNAs used in this study.**

| siRNAs | Gene | Species | Sequence(sense/forward) | Sequence(antisense/reverse) |
| --- | --- | --- | --- | --- |
| siArmh4-rat | Armh4 | Rat | CCUGACCCAUCAGAUUUCCUUCACU | AGUGAAGGAAAUCUGAUGGGUCAGG |
| siArmh4-hum | ARMH4 | Human | CUGAAGUAUAUGGAUAAUCAAUCAU | AUGAUUGAUUAUCCAUAUACUUCAGAA |
| siMyc-rat | Myc | Rat | GAAGAGAAUUUCUAUCACCAGCAAC | GUUGCUGGUGAUAGAAAUUCUCUUCCU |

**Table S2. Primers used for qRT-PCR assays in this study.**

| Primers | Gene | Species | Sequence(sense/forward) | Sequence(antisense/reverse) |
| --- | --- | --- | --- | --- |
| m_Armh4 | Armh4 | Mouse | AGCAGAATCAAGGTCTGGTGAG | AGGCTCCAGCTATCCCTACC |
| m_p16 | Cdkn2a | Mouse | TCGCACGATGTCTTGATGTC | TCAACTACGGTGCAGATTCG |
| m_p21 | Cdkn1a | Mouse | TATCCAGACATTCAGAGCCACA | ACTTTGCTCCTGTGCGGAA |
| m_p53 | Trp53 | Mouse | CTCCGAAGACTGGATGACTG | ACAGATCGTCCATGCAGTGAG |
| m_Il1b | Il-1b | Mouse | CCGTGGACCTTCCAGGATGA | GGGAACGTCACACACCAGCA |
| m_Il6 | Il-6 | Mouse | AGTTGCCTTCTTGGGACTGA | TCCACGATTTCCCAGAGAAC |
| m_Tnf | Tnf-a | Mouse | CATCTTCTCAAAATTCGAGTGACAA | TGGGAGTAGACAAGGTACAACCC |
| m_Acta2 | Acta2 | Mouse | CTTCGTGACTACTGCCGAGC | AGGTGGTTTCGTGGATGCC |
| m_Col1a1 | Col1a1 | Mouse | ACCTTCCTGCGCCTAATGTC | AGTTCCGGTGTGACTCGTG |
| m_Ki67 | Ki67 | Mouse | CATTGACCGCTCCTTTAGGTATG | CCATCTGAGGCAGGGCTATC |
| m_Gapdh | Gapdh | Mouse | TCCTGCACCACCAACTGCTTAG | GATGACCTTGCCCACAGCCTTG |
| m_Nppa | Nppa | Mouse | TTTCAAGAACCTGCTAGACCACC | GATCTATCGGAGGGGTCCCA |
| m_Nppb | Nppb | Mouse | CGCTGGGAGGTCACTCCTAT | CTTCAGTGCGTTACAGCCCAA |
| m_Myh6 | Myh6 | Mouse | AGCTCACCTACCAGACAGAGG | TTCCTCGTCGTGCATCTTCTT |
| m_Myh7 | Myh7 | Mouse | GGCCTGGGCTTACCTCTCTA | ACAGTCACCGTCTTGCCATT |
| m_Acta1 | Acta1 | Mouse | GCTGTGTTCCCATCCATCGT | GCAGGCACGTTGAAGGTCTC |
| h_GAPDH | GAPDH | Human | CTAGGCGCTCACTGTTCTCT | GCCCAATACGACCAAATCCGT |
| h_ Il1b | IL-1β | Human | ATGATGGCTTATTACAGTGGCAA | GTCGGAGATTCGTAGCTGGA |
| h_ Il6 | IL-6 | Human | ACTCACCTCTTCAGAACGAATTG | CCATCTTTGGAAGGTTCAGGTTG |
| h_ Tnf | TNF-α | Human | CCCATGTTGTAGCAAACCCT | TATCTCTCAGCTCCACGCCA |
| m_Hmgcr | Hmgcr | Mouse | ATCATGTGCTGCTTCGGCTGCAT | AAATTGGACGACCCTCACGGCT |
| m_Srebp1c | Srebp1c | Mouse | CACTTCTGGAGACATCGCAAAC | ATGGTAGACAACAGCCGCATC |
| m_Abcg1 | Abcg1 | Mouse | GGTTGCGACATTTGTGGGTC | TTCTCGGTCCAAGCCGTAGA |
| m_Cyp7a1 | Cyp7a1 | Mouse | CTGGGCTGTGCTCTGAAGTT | TGCCTTCGCAGAAGTAGTGT |
| m_Ldlr | Ldlr | Mouse | CACACAGCCTAGAGAAGTCG | GATCCTCACTGTGCTTCGGT |
| m_Srebp2 | Srebp2 | Mouse | GGGGCTGTCGGGTGTC | GGAACTCTCCCACTTGATTGC |
| m_Fatp1 | Fatp1 | Mouse | TGCACAGCAGGTACTACCGCAT | TGCGCAGTACCACCGTCAAC |
| m_Cd36 | Cd36 | Mouse | GACTGGGACCATTGGTGATGA | AAGGCCATCTCTACCATGCC |
| m_Cpt1a | Cpt1a | Mouse | AGGACCCTGAGGCATCTATT | ATGACCTCCTGGCATTCTCC |
| m_Fasn | Fasn | Mouse | CTGCGGAAACTTCAGGAAATG | GGTTCGGAATGCTATCCAGG |
| m_Pparg | Pparg | Mouse | ATTCTGGCCCACCAACTTCGG | TGGAAGCCTGATGCTTTATCCCCA |
| m_Acaca | Acaca | Mouse | GCCGCCAGCCTGAGTTCTT | GGGAGCCCTCCTTCTCTTCT |
| m_Pten | Pten | Mouse | GTGGTCTGCCAGCTAAAGGTGA | TCAGACTTTTGTAATTTGTGAATGCT |
| m_Glut2 | Glut2 | Mouse | TTCACGGCTGTCTCTGTGCT | TGCCAATCATCCCGGTTAGG |
| m_Pdk4 | Pdk4 | Mouse | TTCACACCTTCACCACATGC | AAAGGGCGGTTTTCTTGATG |
| m_Pepck | Pepck | Mouse | TGCCCCAGGCAGTGAGGAAGTT | GTCAGTGAGAGCCAGCCAACAGT |
| m_G6pase | G6pase | Mouse | CGACTCGCTATCTCCAAGTGA | GGGCGTTGTCCAAACAGAAT |
| m_Irs1 | Irs1 | Mouse | AATGAGGGCAACTCCCCAAG | AGGTCTTCATTCTGCTGTGATGT |
|  |  |  |  |  |
